# Supplementary material for: Stress-testing groundwater and baseflow drought responses to synthetic climate change-informed recharge scenarios
Source: Copernicus journal article supplement (doi:10.5194/hess-2020-211), 2020-07-02
Supplement: Supplementary file 1 [file hess-2020-211-supplement.pdf]

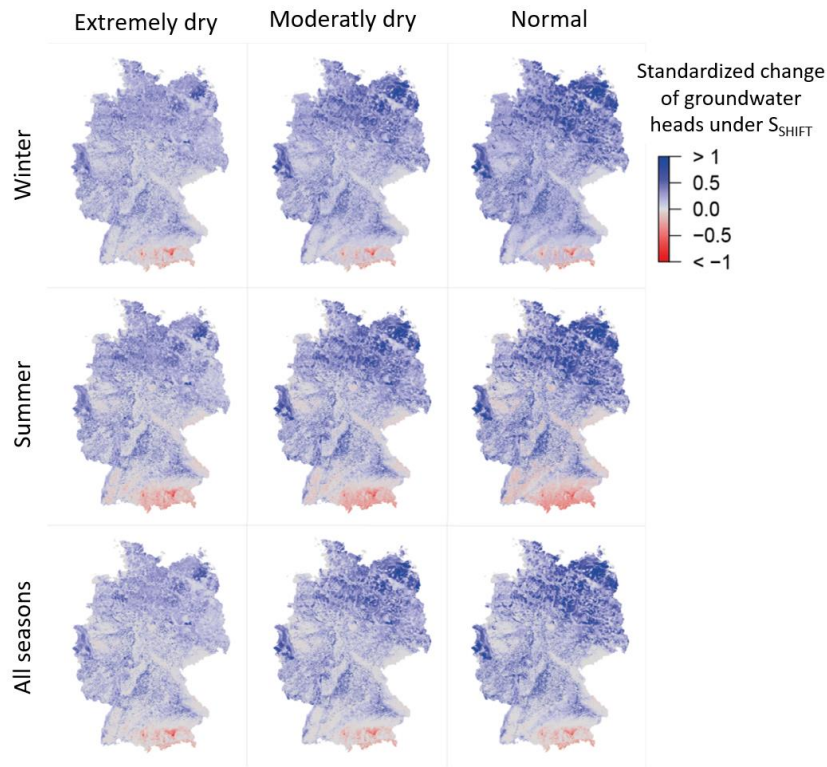

Fig S1: Groundwater head changes standardized by the standard deviation of natural variability for  $S_{SHIFT}$ .

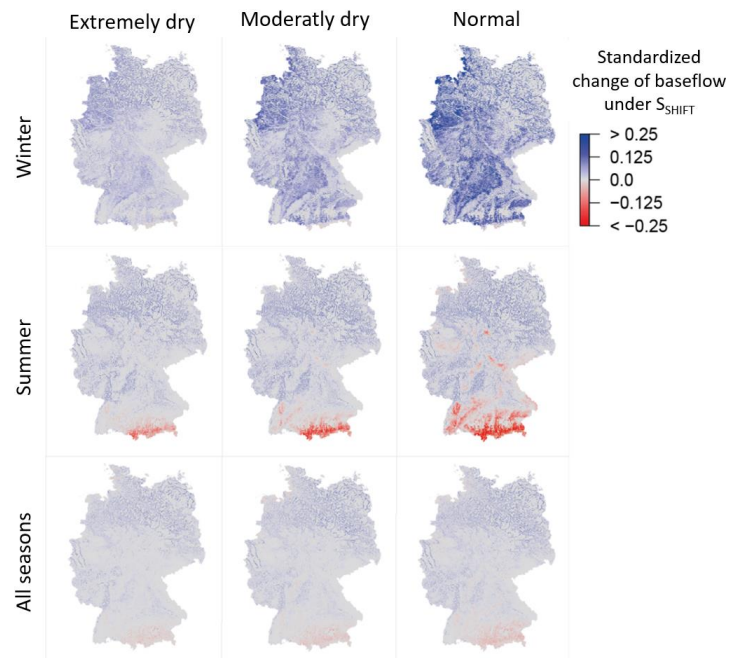

Fig S2: Baseflow changes standardized by the standard deviation of natural variability for  $S_{SHIFT}$ .

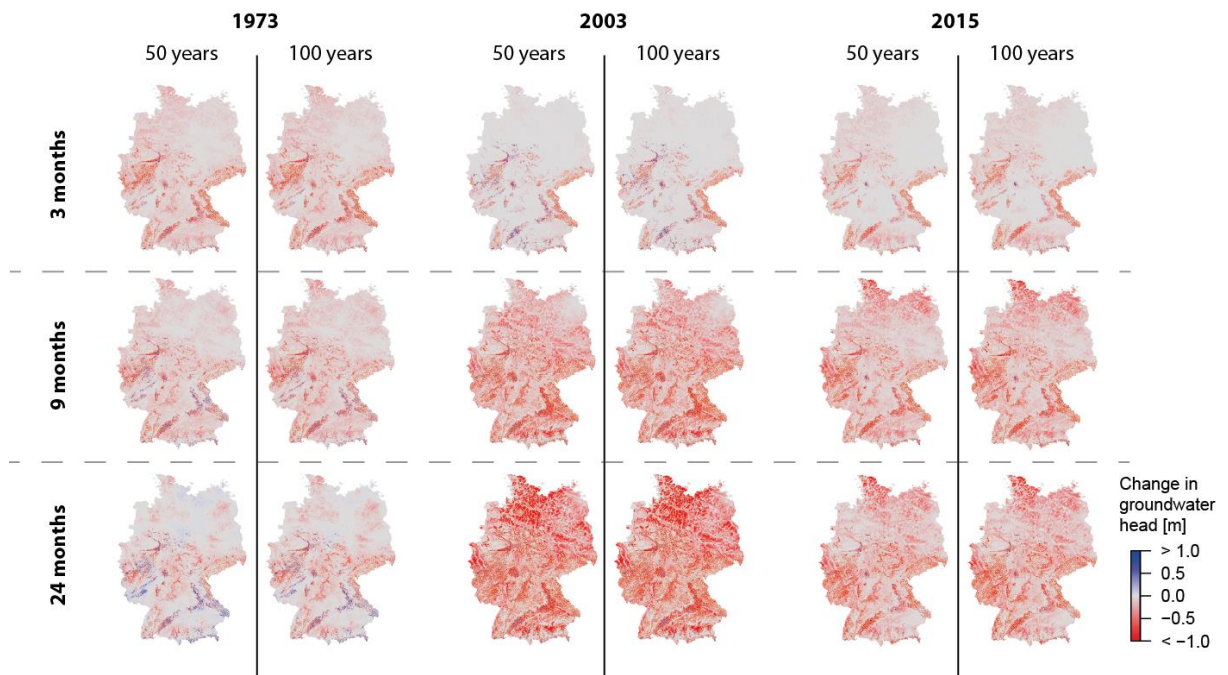

Fig. S3: Average groundwater head changes during drought across Germany for the  $S_{EVENT}$  scenarios: response of different events (1973, 2003, 2015), different antecedent recharge reduction time scales (3, 9, 24 months) and two return periods ( $T_{RP} = 50$  and  $T_{RP} = 100$  years).

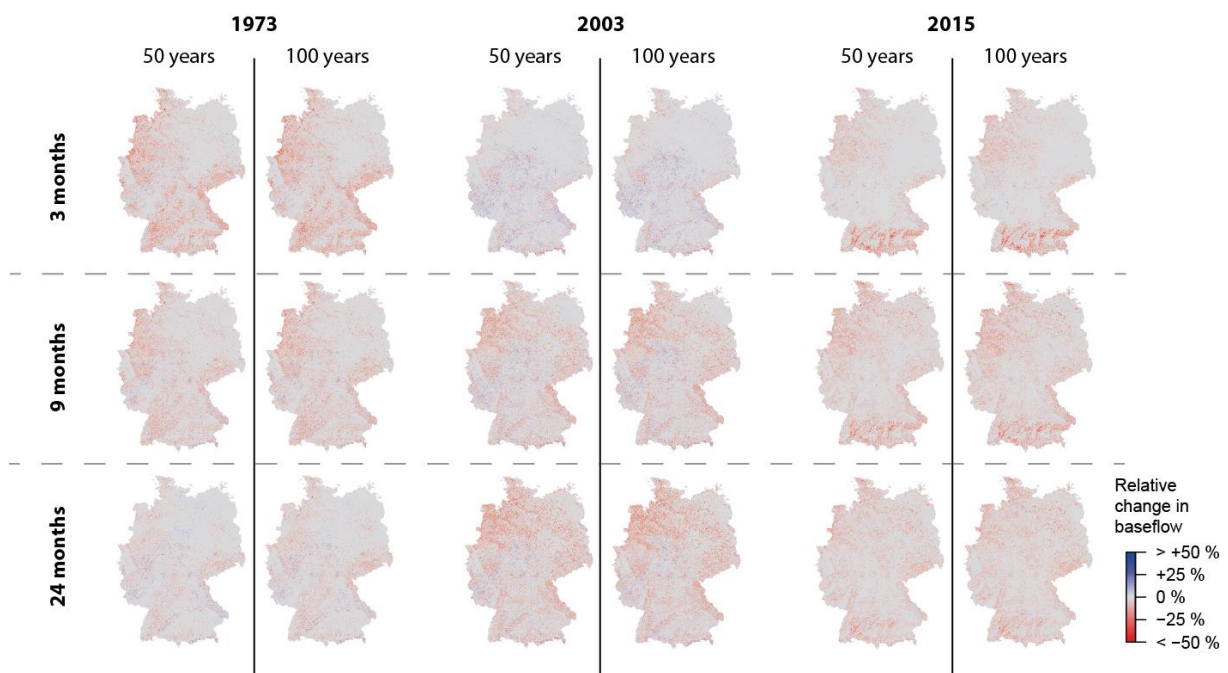

Fig. S4: Average relative changes of baseflow across Germany for different recharge scenarios. Maps are in the same order like in Figure 5.

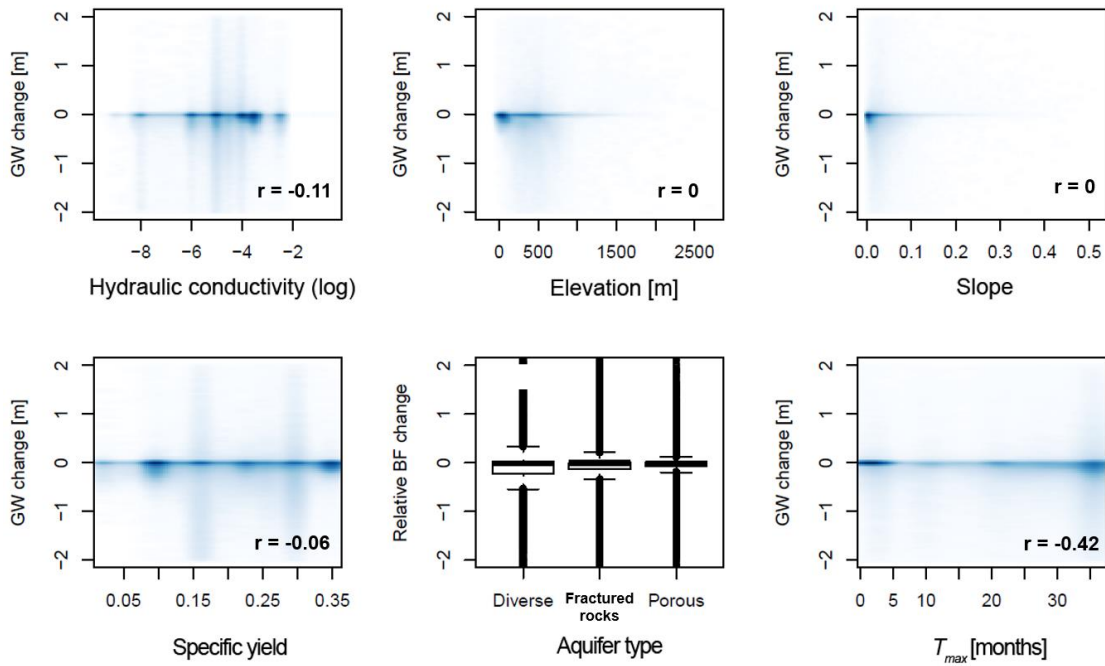

Fig S5: Average groundwater head changes for 24-months antecedent recharge reductions according to  $T_{RP} = 100y$  for the 1973 drought event over different factors. Blue colours indicate the smoothed density derived from all model grid cells. Boxes illustrate the distribution of  $T_{rec}$  in three different categories of aquifer type.  $r$  is the Spearman correlation coefficient for the variables compared.

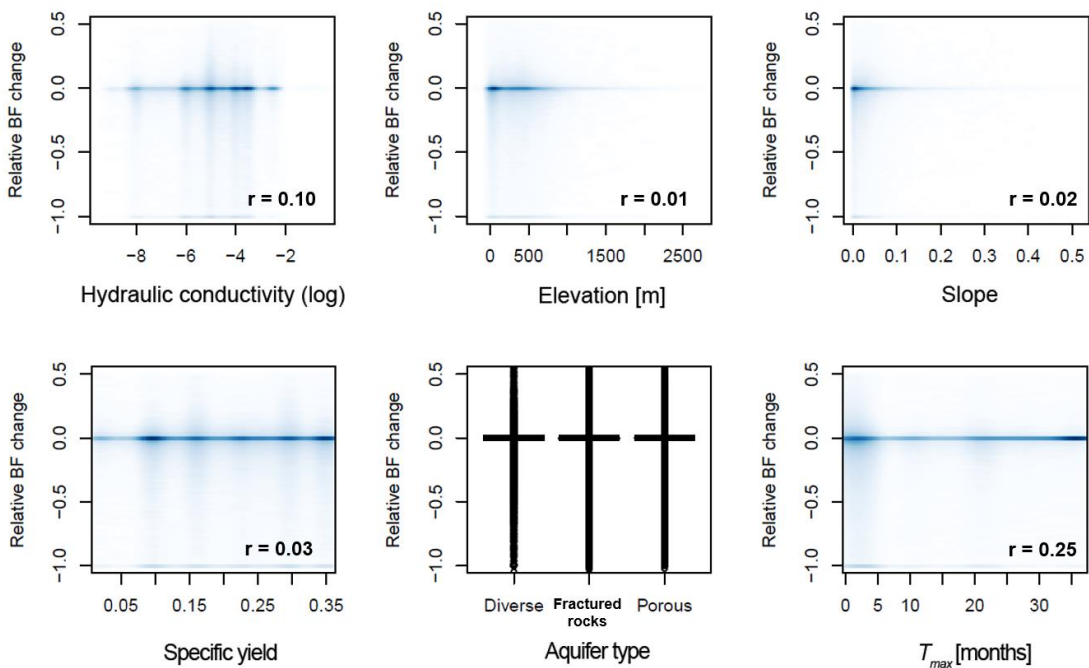

Fig S6: Relative baseflow changes for 24-months antecedent recharge reductions according to  $T_{RP} = 100y$  the 2003 drought event over different factors. Figure style according to Figure S5.
